# Supplementary material
Source: PubMed Central journal article supplement (PMC10792466)
Supplement: jama-e2325881-s002.pdf [file jama-e2325881-s002.pdf]

## Data Sharing Statement

Caswell-Jin. Analysis of Breast Cancer Mortality in the US—1975 to 2019. *JAMA*. Published January 16, 2024. doi:10.1001/jama.2023.25881

### Data

**Data available:** No

### Additional Information

**Explanation for why data not available:** The patient-level NCCN Outcomes Database data used for model inputs were available under a data use agreement with NCCN; researchers may enter into data use agreements with the NCCN to obtain these data. The SEER data used are publicly available. The models also used previously published estimates of screening and treatment dissemination that relied on data sources on screening (Breast Cancer Surveillance Consortium) and treatment (National Cancer Database, SEER Patterns of Care, and IBM MarketScan).
